# Supplementary material for: The nature of aryloxide and arylsulfide ligand bonding in dimethyltitanium complexes containing cyclopentadienyl ligation
Source: Royal Society of Chemistry journal article supplement (doi:10.1039/b412455c), 2005-01-01
Supplement: b412455c.doc [file b412455c.doc]

**Supplementary Information**

**The Nature of Aryloxide and Arylsulfide Ligand Bonding in Dimethyltitanium Complexes Containing Cyclopentadienyl Ligation**

Thomas A. Manz†, Andrew E. Fenwick‡, Khamphee Phomphrai‡, Ian P. Rothwell‡, and Kendall T. Thomson†*; †School of Chemical Engineering, ‡Department of Chemistry, Purdue University, West Lafayette, IN 47907, *E-mail: [thomsonk@purdue.edu](mailto:thomsonk@purdue.edu)

**A. Synthesis and Characterization of [CpTi(SC6H2Pri3-2,4,6)Me2] (2).**

A suspension of [CpTiCl3] (1.00 g, 4.56 mmol in 30 mL Et2O) was cooled to -78 °C in a dry ice/acetone bath. To this suspension was added [LiMe] (8.8 mL, 1.6 *M* in diethyl ether, 14.1 mmol) via syringe under a flush of nitrogen. After stirring for approximately 3 hours, a solution of 2,4,6-triisopropylbenzenethiol (1.18 g, 5.01 mmol in 10 mL Et2O) was added dropwise at -78ºC. The mixture was allowed to slowly warm to room temperature and was stirred overnight. The solvent was removed under vacuum, and benzene was added to the residue. The suspension was filtered through a plug of Celite over fritted glass to remove the lithium salts. The filtrate was then evacuated to dryness yielding a yellow solid (1.51 g, 88%). The crude product was dissolved in 5 mL hexane and cooled to -20 °C, yielding X-ray quality crystals (1.00 g, 58%). Anal. Calcd. for C22H34STi: C, 69.82; H, 9.06. Found: C, 69.43; H, 8.93. 1H NMR (C6D6, 25˚C): *δ* 7.36 (s, *m*-*H*); 5.96 (s, *Cp*); 3.82 (septet, *o*-C*H*Me2), 3*J*(1H-1H) = 6.8 Hz; 2.91 (septet, *p*-C*H*Me2), 3*J*(1H-1H) = 6.9 Hz ; 1.37 (d, *o*-CH*Me*2), 3*J*(1H-1H) = 6.6 Hz; 1.30 (d, *p*-CH*Me*2), 3*J*(1H-1H) = 6.9 Hz; 1.02 (s, Ti-*Me*). 13C NMR (C6D6, 25˚C): *δ* 150.2, 149.0, 136.2, 121.9 (*aromatics*); 114.5 (*Cp*); 67.7 (Ti-*Me*); 34.7 (*p*-*C*HMe2); 32.9 (*o*-*C*HMe2); 24.4 (*p*-CH*Me*2); 23.6 (*o*-CH*Me*2).


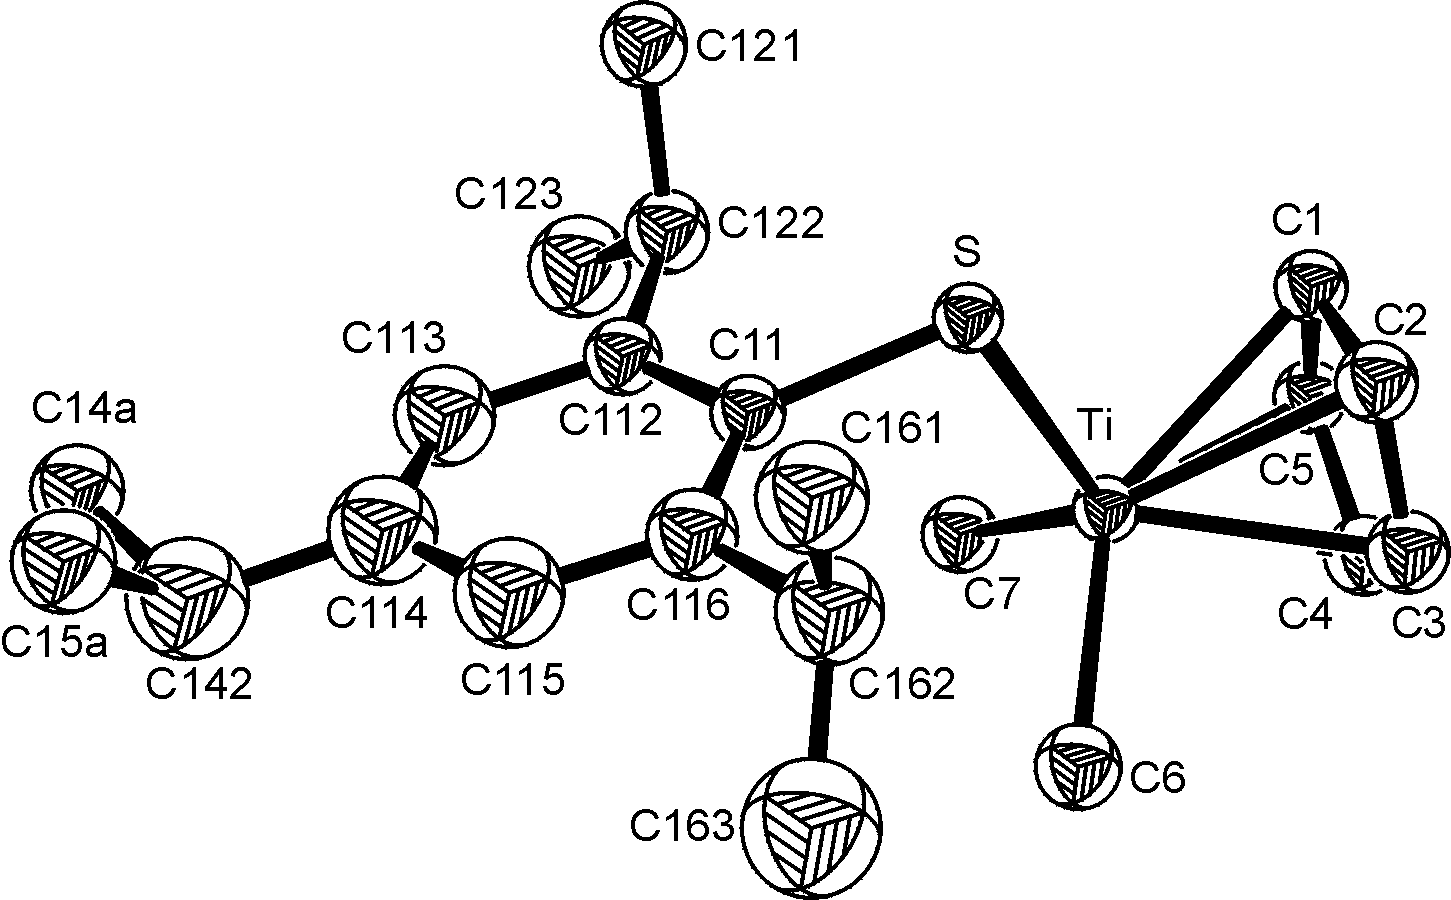


ORTEP drawing (50% thermal ellipsoids) of CpTi(SC6H2Pri3-2,4,6)Me2, **2**.

1. **Geometric Parameters Computed with Different Exchange-Correlation Functionals and Basis Sets**

**Bond Distances (Å) and Angles () of distal [CpTi(SC6H2Me3-2,4,6)Me2]**

|  | Experimental | OLYP  6-311+G | OLYP  6-311++G** | B3LYP  6-311+G | B3LYP  6-311++G** |
| --- | --- | --- | --- | --- | --- |
|  |  |  |  |  |  |
| Ti-S | 2.3242(8) | [2.3966] | [2.3716] | [2.3717] | [2.3506] |
| Ti-C(6) | 2.105(2) | [2.1094] | [2.1133] | [2.0939] | [2.1003] |
| Ti-C(7) | 2.142(2) | [2.1093] | [2.1134] | [2.0939] | [2.1003] |
| Ti-Cp | 2.040(3) | [2.099] | [2.04] | [2.105] | [2.08] |
|  |  |  |  |  |  |
| S-Ti-Cp | 111.1(1) | [110.4] | [109.7] | [112.4] | [111.5] |
| S-Ti-C(6) | 107.62(6) | [109.7] | [110.2] | [108.6] | [109.0] |
| S-Ti-C(7) | 109.74(7) | [109.7] | [110.3] | [108.6] | [109.0] |
| Ti-S-C(11) | 99.78(7) | [107.4] | [106.5] | [103.8] | [103.4] |
| C(6)-Ti-C(7) | 100.2(1) | [101.0] | [100.9] | [99.2] | [99.5] |
| C(6)-Ti-Cp | 113.2(1) | [112.8] | [112.8] | [113.6] | [113.6] |
| C(7)-Ti-Cp | 114.3(1) | [112.8] | [112.8] | [113.7] | [113.6] |

**OLYP/6-311+G Bond Distances (Å) and Angles ()**

|  | [CpTi(OC6H2Me2-2,6-Br-4)Me2]1 | [CpTi(OC6H3Me2-2,6)Me2] | [CpTi(OC6H3Pri2-2,6)Me2] | [CpTi(SC6H2Me3-2,4,6)Me2]2 | | [CpTi(SC6H2Pri3-2,4,6)Me2]2 | |
| --- | --- | --- | --- | --- | --- | --- | --- |
|  |  |  |  | *distal* | *proximal* | *distal* | *proximal* |
| Ti-E3 | 1.812(1)4  [1.8323]5 | [1.8276] | [1.8275] | 2.3242(8)  [2.3966] | [2.3643] | 2.325(2)  [2.4220] | [2.3603] |
| Ti-C(6) | 2.088(2)  [2.1247] | [2.1258] | [2.1260] | 2.105(2)  [2.1094] | [2.1123] | 2.072(9)  [2.1062] | [2.1135] |
| Ti-C(7) | 2.101(2)  [2.1249] | [2.1258] | [2.1262] | 2.142(2)  [2.1093] | [2.1133] | 2.061(8)  [2.1098] | [2.1142] |
| Ti-Cp | 2.046(2)  [2.115] | [2.119] | [2.097] | 2.040(3)  [2.099] | [2.096] | 2.032(8)  [2.107] | [2.096] |
|  |  |  |  |  |  |  |  |
| E-Ti-Cp | 120.29(9)  [123.6] | [123.2] | [122.7] | 111.1(1)  [110.4] | [121.1] | 110.69(2)  [110.4] | [121.1] |
| E-Ti-C(6) | 103.64(8)  [103.5] | [103.7] | [104.0] | 107.62(6)  [109.7] | [102.7] | 108.5(3)  [109.6] | [102.5] |
| E-Ti-C(7) | 103.72(7)  [103.5] | [103.7] | [104.3] | 109.74(7)  [109.7] | [103.0] | 109.3(3)  [114.8] | [103.0] |
| Ti-E-C(11) | 150.0(1)  [167.9] | [167.1] | [167.2] | 99.78(7)  [107.4] | [123.1] | 102.5(2)  [110.9] | [125.43] |
| C(6)-Ti-C(7) | 100.80(9)  [101.2] | [101.2] | [100.8] | 100.2(1)  [101.0] | [102.7] | 97.3(4)  [96.3] | [103.0] |
| C(6)-Ti-Cp | 112.91(9)  [111.2] | [111.4] | [111.4] | 113.2(1)  [112.8] | [112.7] | 115.3(3)  [113.5] | [112.6] |
| C(7)-Ti-Cp | 113.21(9)  [111.2] | [111.3] | [111.3] | 114.3(1)  [112.8] | [112.6] | 114.9(3)  [111.5] | [112.6] |

1 Data taken from Ref. 9; 2 Conformer with ArS distal or proximal to Cp ring; 3 E = O or S; 4 Experimental values (X-ray crystallography); 5 DFT calculation (OLYP/6-311+G)
